# Supplementary material for: Dectin-1-Independent Macrophage Phagocytosis of Mycobacterium abscessus
Source: MDPI journal article supplement (doi:10.3390/ijms241311062), 2023-07-04

Supplementary Figure S1: flow cytometry analysis, gating strategy for human MDMs

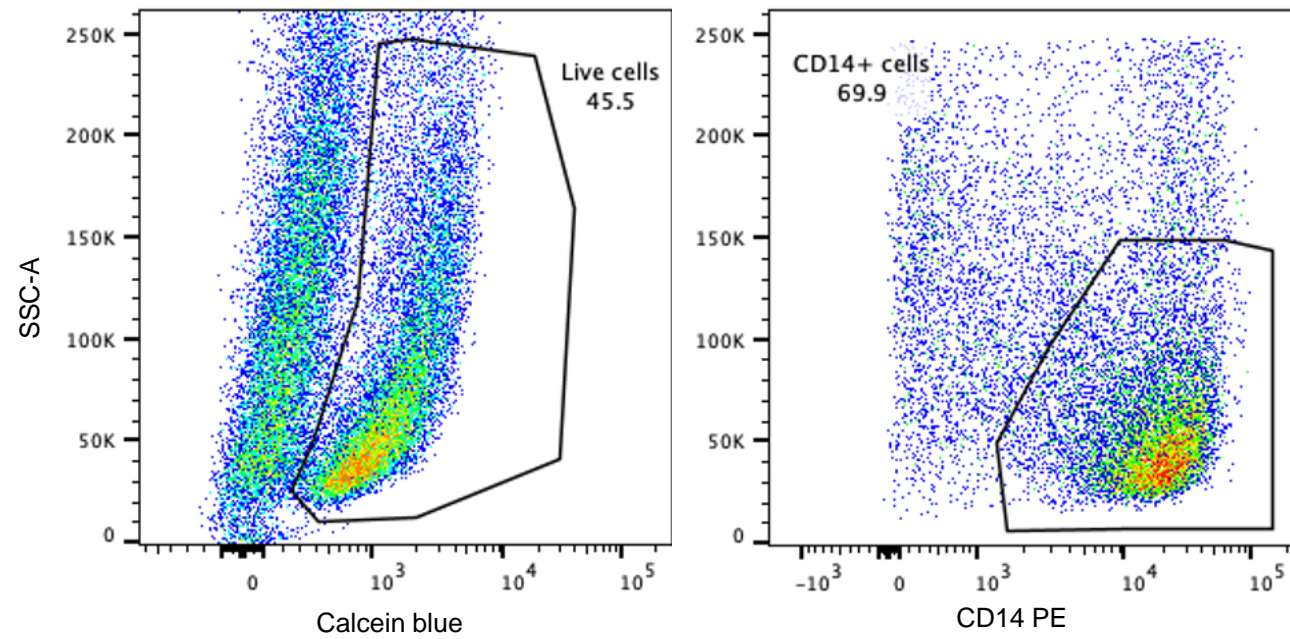

# Supplementary Figure S2: flow cytometry analysis, gating strategy for mouse BAL

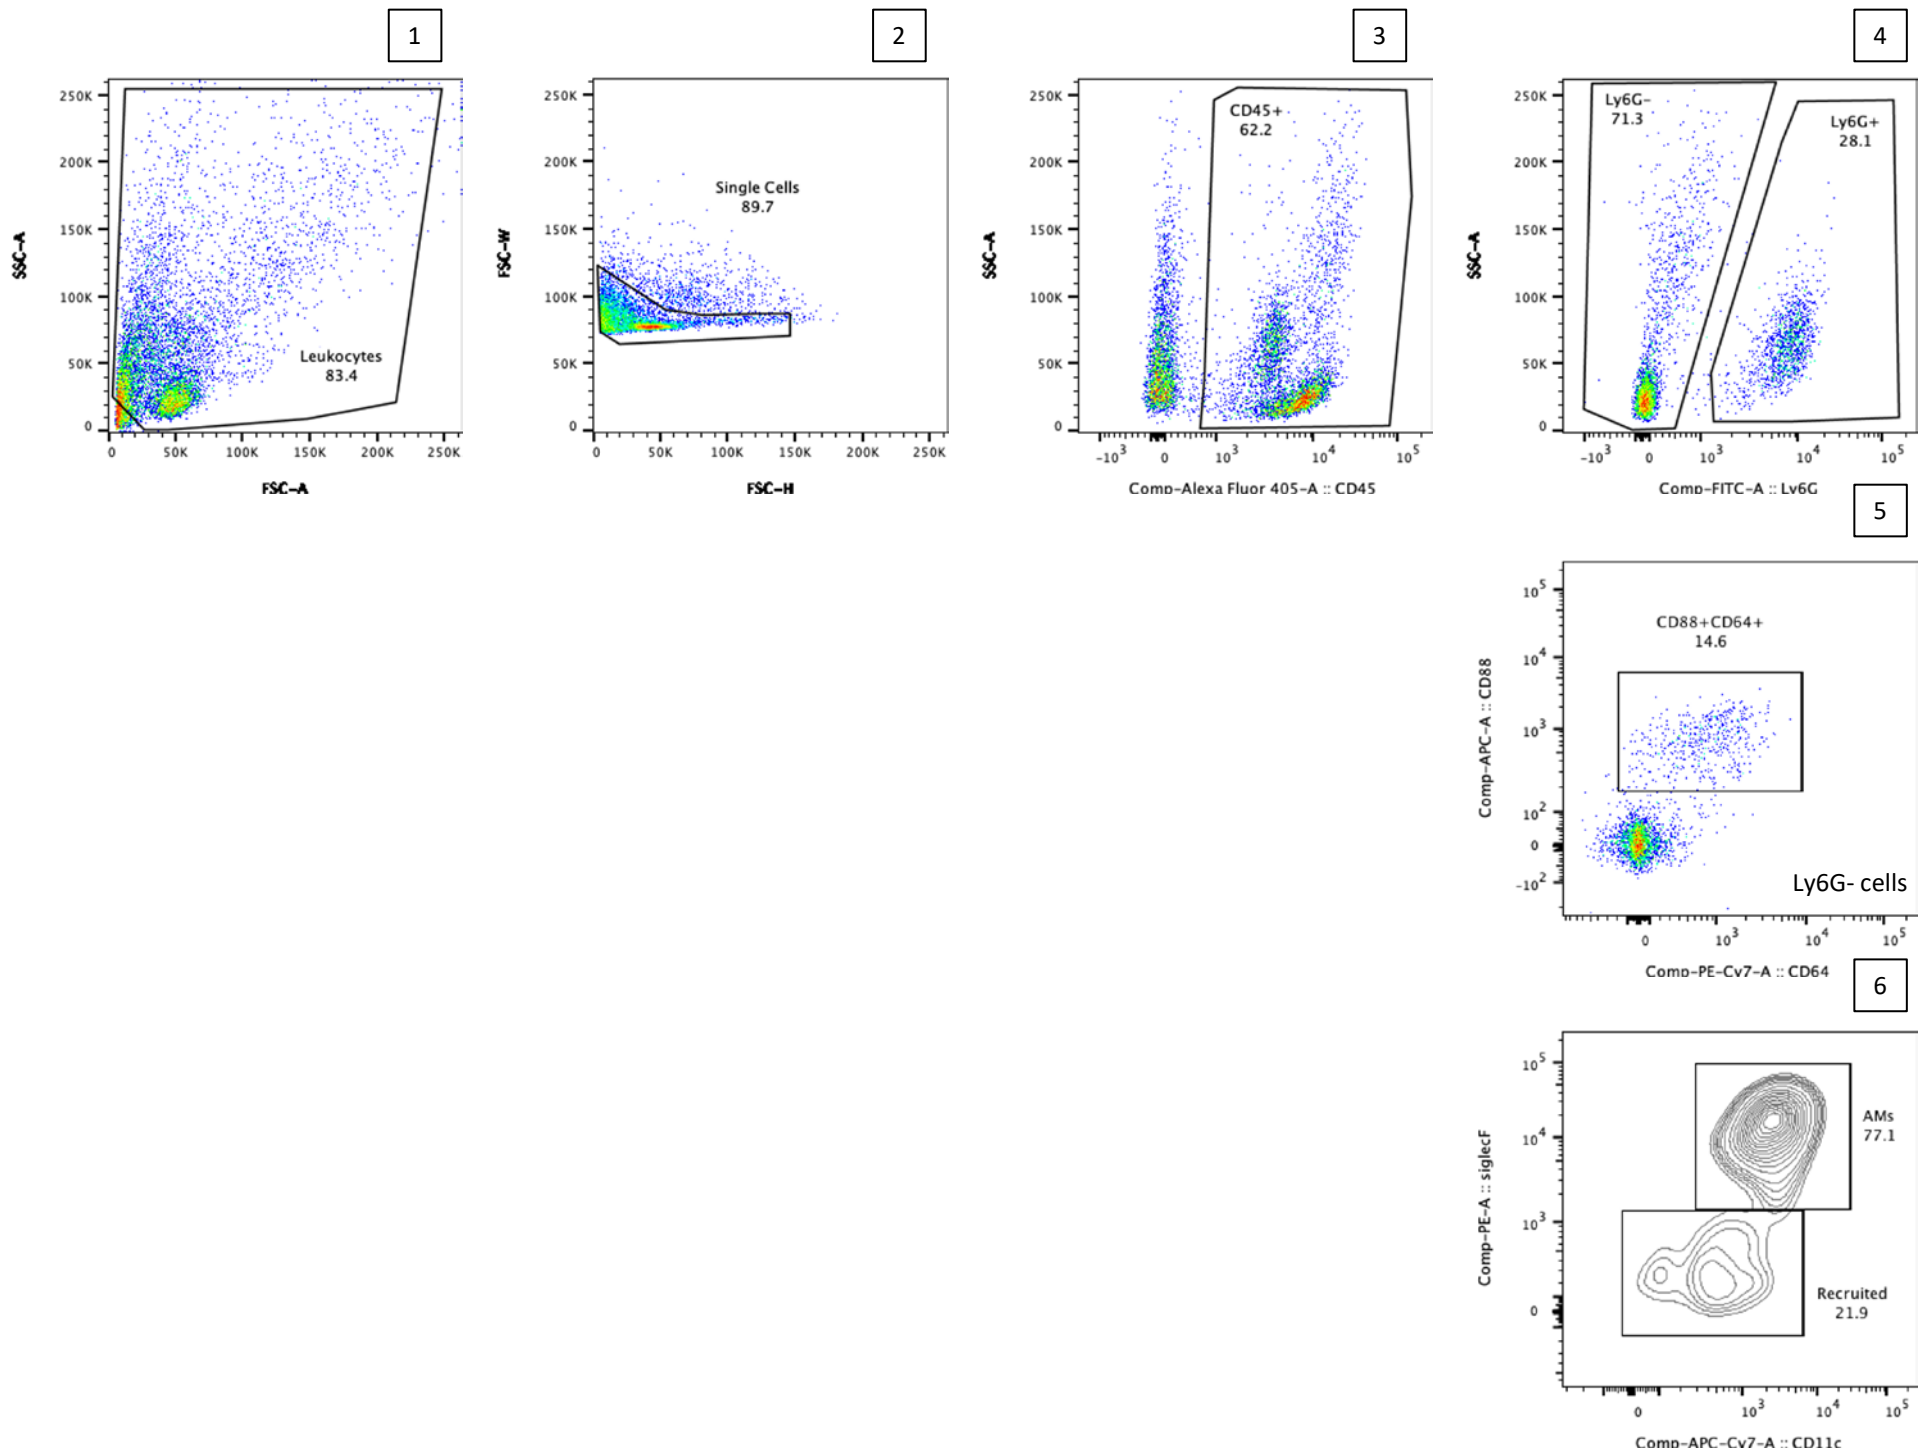

# Supplementary Figure S3: flow cytometry analysis, gating strategy for mouse lung homogenates

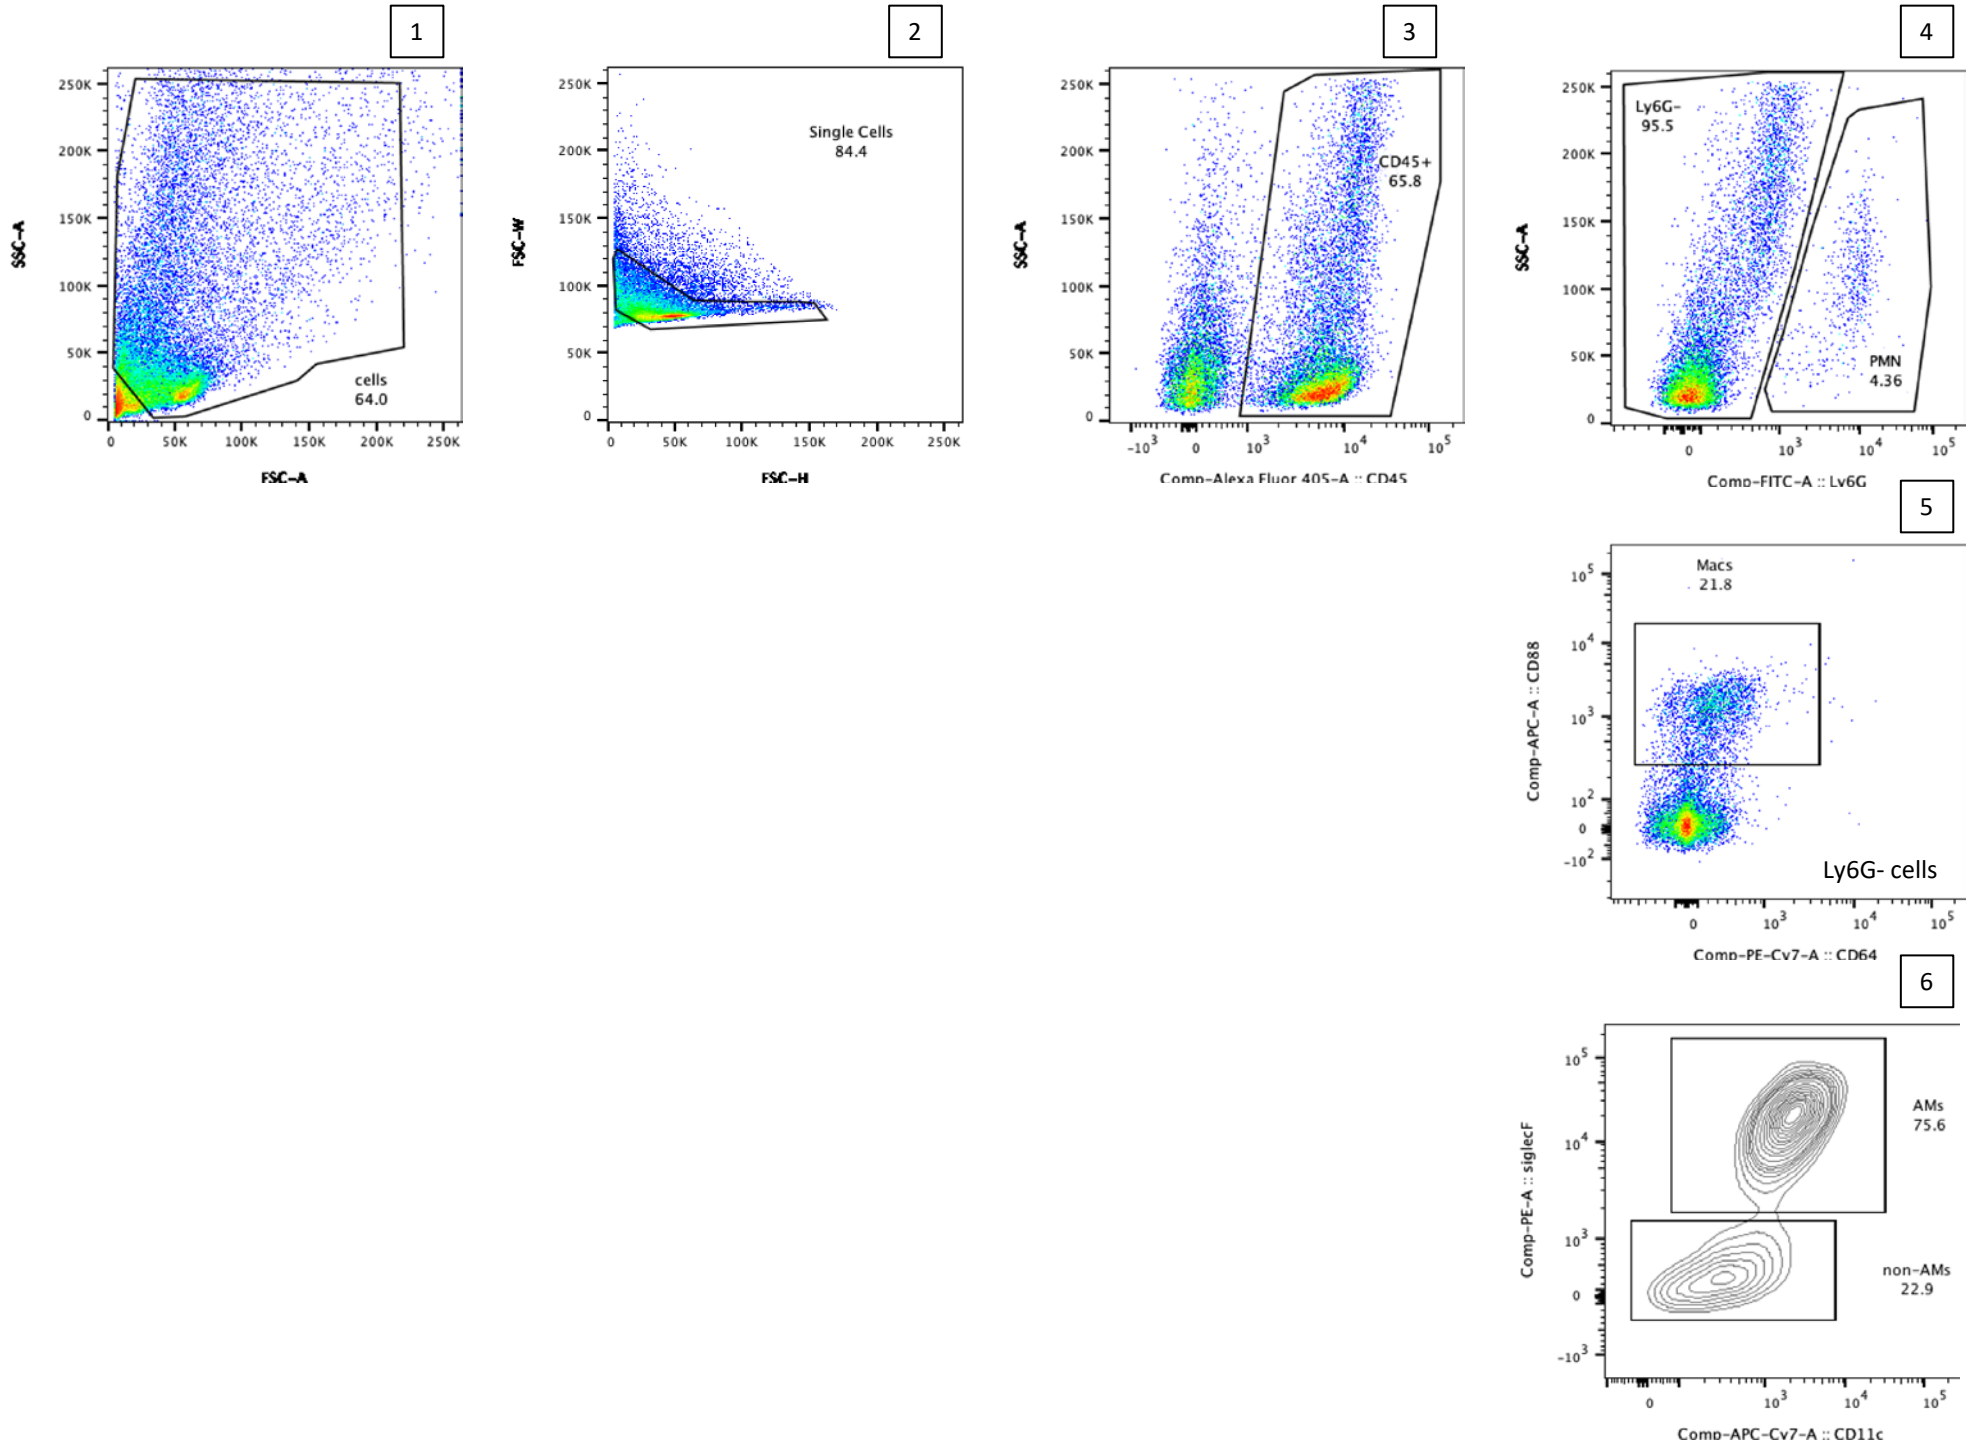

Supplement: s1 [file s1]
